# Supplementary material for: Modulation of the magnetic properties of mononuclear Dy(iii) complexes by tuning the coordination geometry and local symmetry
Source: Royal Society of Chemistry journal article supplement (doi:10.1039/d4dt02135e), 2024-01-01
Supplement: d4dt02135e1.pdf [file d4dt02135e1.pdf]

## Supporting Information

### Modulation of the magnetic properties of mononuclear Dy(III) complexes by tuning the coordination geometry and local symmetry

Xuejuan Zhou,<sup>a#</sup> Huiliang Qin,<sup>a#</sup> Zhaopeng Zeng,<sup>b#</sup> Shuchang Luo,<sup>\*d</sup> Tao Yang,<sup>c</sup> Peipei Cen,<sup>\*a</sup> Xiangyu Liu<sup>\*b</sup>

<sup>a</sup>College of Public Health, Key Laboratory of Environmental Factors and Chronic Disease Control, Ningxia Medical University, Yinchuan 750021, China.

<sup>b</sup>State Key Laboratory of High-Efficiency Utilization of Coal and Green Chemical Engineering, College of Chemistry and Chemical Engineering, School of Civil and Hydraulic Engineering, Ningxia University, Yinchuan 750021, China.

<sup>c</sup>Ningxia People's Hospital, Yinchuan 753009, China.

<sup>d</sup>College of Chemical Engineering, Guizhou University of Engineering Science, Bijie 551700, China.

# These authors contributed equally to this work.

**\*Corresponding author**

**Dr. Peipei Cen**

**E-mail address: 13895400691@163.com**

**Prof. Xiangyu Liu**

**E-mail: xiangyuli432@126.com**

**Dr. Shuchang Luo**

**Email: luosc@gues.edu.cn**

## Contents

- Table S1.** Crystal data and structure refinement details for **1-3**.
- Table S2.** Selected bond lengths (Å) and bond angles (°) for **1-3**.
- Table S3.** Hydrogen-bonded parameters (Å, °) for **2**.
- Table S4.** Continuous Shape Measurements (CShMs) for Dy(III) ions in **1-3** by SHAPE 2.1.
- Table S5.** Relaxation fitting parameters from least-squares fitting of  $\chi(f)$  data under 1000 Oe dc field of **1**.
- Table S6.** Relaxation fitting parameters from least-squares fitting of  $\chi(f)$  data under 1000 Oe dc field of **2**.
- Table S7.** Relaxation fitting parameters from least-squares fitting of  $\chi(f)$  data under 500 Oe dc field of **3**.
- Table S8.** Calculated energy levels (cm<sup>-1</sup>) and  $g$  ( $g_x, g_y, g_z$ ) tensors and  $\tau_{\text{QTM}}$  (s) of the lowest eight Kramers doublets (KDs) of **1, 1a, 2a, 2b** and **3** using CASSCF/RASSI-SO with ORCA.
- Table S9.** Wave functions with definite projection of the total moment  $|m_j\rangle$  for the lowest eight KDs of **1, 1a, 2a, 2b** and **3** using CASSCF/RASSI-SO with ORCA.
- Table S10.** Mulliken atomic charge on the metal atoms and donor atoms in the ground state of **1, 1a, 2a, 2b** and **3** calculated within B3LYP-D3/DKH-def2-TZVP level.
- Table S11.** Mulliken spin density of **1, 1a, 2a, 2b** and **3**.
- Table S12.** Calculated crystal field parameters  $B(k, q)$  for **1, 1a, 2a, 2b** and **3** using CASSCF/RASSI-SO with ORCA.
- Fig. S1** Crystal packing diagram for complex **1**. All hydrogen atoms, solvent molecules, and the counter ion [BPh<sub>4</sub>]<sup>+</sup> for **1** are omitted for clarity.
- Fig. S2** (a) Crystal packing diagram for complex **2**. All hydrogen atoms (except for the H atoms in the H-bonds), solvent molecules, and the counter ion [PF<sub>6</sub>]<sup>+</sup> for **2** are omitted for clarity. (b) Hydrogen bonding in complex **2** (the dashed line represents the interaction).
- Fig. S3** Crystal packing diagram for complex **3**. All hydrogen atoms, solvent molecules, and the counter ion [BPh<sub>4</sub>]<sup>+</sup> for **3** are omitted for clarity.
- Fig. S4** PXRD curves of **1** (a), **2** (b) and **3** (c).
- Fig. S5**  $M$  vs  $H/T$  curves for **1** (a), **2** (b) and **3** (c) at indicated temperatures.
- Fig. S6** Ac magnetic susceptibility measurements for **1** (a), **2** (b) and **3** (c) in zero static field.
- Fig. S7** Frequency dependence of  $\chi''_{\text{M}}$  susceptibilities for **1** (a), **2** (b) and **3** (c) under different dc fields.
- Fig. S8** Temperature dependence of the in-phase ( $\chi'_{\text{M}}$ , top) and out-of-phase ( $\chi''_{\text{M}}$ , bottom) ac susceptibilities at different frequencies under the external dc fields for complexes **1** (a, d), **2** (b, e) and **3** (c, f).
- Fig. S9** Frequency dependence of  $\chi'_{\text{M}}$  susceptibilities for **1** (a), **2** (b) and **3** (c) under the external dc fields.
- Fig. S10** Frequency dependence of  $\chi''_{\text{M}}$  susceptibilities for **1** under the external dc fields.
- Fig. S11** Cole-Cole plots under the static dc fields for **1** (a), **2** (b) and **3** (c). The solid lines represent the best fit to the measured results.
- Fig. S12** Calculated orientations of the local main magnetic axes on Dy(III) in the ground KDs of **1** (a), **1a** (b), **2a** (c), **2b** (d) and **3** (e).
- Fig. S13** Predicted effective barrier and relaxation contributions from various KDs of complexes **1** (a), **1a** (b), **2a** (c), **2b** (d) and **3** (e),  $U_{\text{eff}}$  is represented as a dashed black line, and its value is indicated on the right y-axis, the left y-axis represents the relative contribution of each KD to relaxation.

**Table S1.** Crystal data and structure refinement details for **1-3**.

| complex                                             | 1                                                                                | 2                                                                                                                              | 3                                                                                |
|-----------------------------------------------------|----------------------------------------------------------------------------------|--------------------------------------------------------------------------------------------------------------------------------|----------------------------------------------------------------------------------|
| Empirical formula                                   | C <sub>51</sub> H <sub>54</sub> BCl <sub>2</sub> DyN <sub>6</sub> O <sub>4</sub> | C <sub>68</sub> H <sub>69</sub> Cl <sub>8</sub> Dy <sub>2</sub> F <sub>12</sub> N <sub>16</sub> O <sub>17</sub> P <sub>2</sub> | C <sub>60</sub> H <sub>54</sub> BCl <sub>8</sub> DyN <sub>8</sub> O <sub>6</sub> |
| Formula weight                                      | 1059.23                                                                          | 2280.93                                                                                                                        | 1440.02                                                                          |
| Temperature                                         | 296.0 K                                                                          | 150.0 K                                                                                                                        | 296.0 K                                                                          |
| Crystal system                                      | triclinic                                                                        | triclinic                                                                                                                      | monoclinic                                                                       |
| Space group                                         | $P\bar{1}$                                                                       | $P\bar{1}$                                                                                                                     | $P2_1/n$                                                                         |
| <i>a</i> (Å)                                        | 10.4067(5)                                                                       | 12.6622(7)                                                                                                                     | 12.429(5)                                                                        |
| <i>b</i> (Å)                                        | 14.5674(7)                                                                       | 18.6466(12)                                                                                                                    | 16.344(6)                                                                        |
| <i>c</i> (Å)                                        | 16.9951(9)                                                                       | 19.8147(13)                                                                                                                    | 30.943(10)                                                                       |
| $\alpha$ (°)                                        | 75.868(2)                                                                        | 105.480(2)                                                                                                                     | 90                                                                               |
| $\beta$ (°)                                         | 81.870(2)                                                                        | 91.339(2)                                                                                                                      | 93.964(12)                                                                       |
| $\gamma$ (°)                                        | 79.324(2)                                                                        | 103.205(2)                                                                                                                     | 90                                                                               |
| <i>V</i> (Å <sup>3</sup> )                          | 2442.7(2)                                                                        | 4371.7(5)                                                                                                                      | 6271(4)                                                                          |
| <i>Z</i>                                            | 2                                                                                | 2                                                                                                                              | 4                                                                                |
| <i>D</i> (g/cm <sup>3</sup> )                       | 1.418                                                                            | 1.733                                                                                                                          | 1.525                                                                            |
| <i>Mu</i> (mm <sup>-1</sup> )                       | 1.614                                                                            | 2.075                                                                                                                          | 1.589                                                                            |
| <i>F</i> (0 0 0)                                    | 1063.0                                                                           | 2262.0                                                                                                                         | 2900.0                                                                           |
| Completeness                                        | 99.7                                                                             | 99.3                                                                                                                           | 98.8                                                                             |
| Unique reflections                                  | 11235                                                                            | 14798                                                                                                                          | 14346                                                                            |
| Observed reflections                                | 61817                                                                            | 68773                                                                                                                          | 132829                                                                           |
| <i>R</i> <sub>int</sub>                             | 0.0540                                                                           | 0.0441                                                                                                                         | 0.0355                                                                           |
| Final <i>R</i> indices [ <i>I</i> > 2σ( <i>I</i> )] | <i>R</i> <sub>1</sub> = 0.0348<br><i>wR</i> <sub>2</sub> = 0.0700                | <i>R</i> <sub>1</sub> = 0.0398<br><i>wR</i> <sub>2</sub> = 0.0988                                                              | <i>R</i> <sub>1</sub> = 0.0417<br><i>wR</i> <sub>2</sub> = 0.1101                |
| <i>R</i> indices (all data)                         | <i>R</i> <sub>1</sub> = 0.0475<br><i>wR</i> <sub>2</sub> = 0.0749                | <i>R</i> <sub>1</sub> = 0.0507<br><i>wR</i> <sub>2</sub> = 0.1056                                                              | <i>R</i> <sub>1</sub> = 0.0467<br><i>wR</i> <sub>2</sub> = 0.1131                |
| Goodness-of-fit on <i>F</i> <sup>2</sup>            | 1.060                                                                            | 1.078                                                                                                                          | 1.131                                                                            |

**Table S2.** Selected bond lengths (Å) and bond angles (°) for **1-3**.

| Complex 1        |            |                 |            |
|------------------|------------|-----------------|------------|
| Dy(1)-N(1)       | 2.678(2)   | N(5)-Dy(1)-N(3) | 120.35(9)  |
| Dy(1)-N(2)       | 2.588(2)   | N(5)-Dy(1)-N(4) | 60.37(8)   |
| Dy(1)-N(3)       | 2.610(3)   | N(5)-Dy(1)-N(6) | 64.97(9)   |
| Dy(1)-N(4)       | 2.669(2)   | N(6)-Dy(1)-N(1) | 59.47(8)   |
| Dy(1)-N(5)       | 2.587(3)   | N(6)-Dy(1)-N(4) | 118.92(8)  |
| Dy(1)-N(6)       | 2.619(3)   | O(1)-Dy(1)-N(1) | 103.36(8)  |
| Dy(1)-O(1)       | 2.495(2)   | O(1)-Dy(1)-N(2) | 128.24(8)  |
| Dy(1)-O(2)       | 2.424(3)   | O(1)-Dy(1)-N(3) | 89.40(9)   |
| Dy(1)-O(3)       | 2.426(2)   | O(1)-Dy(1)-N(4) | 69.03(8)   |
| Dy(1)-O(4)       | 2.392(2)   | O(1)-Dy(1)-N(5) | 73.91(9)   |
| N(2)-Dy(1)-N(1)  | 59.94(8)   | O(1)-Dy(1)-N(6) | 71.71(9)   |
| N(2)-Dy(1)-N(3)  | 64.76(8)   | O(2)-Dy(1)-N(1) | 68.59(9)   |
| N(2)-Dy(1)-N(4)  | 121.81(8)  | O(2)-Dy(1)-N(2) | 77.11(9)   |
| N(2)-Dy(1)-N(6)  | 119.16(8)  | O(2)-Dy(1)-N(3) | 73.89(10)  |
| N(3)-Dy(1)-N(1)  | 117.93(8)  | O(2)-Dy(1)-N(4) | 103.53(9)  |
| N(3)-Dy(1)-N(4)  | 60.16(8)   | O(2)-Dy(1)-N(5) | 124.90(9)  |
| N(3)-Dy(1)-N(6)  | 158.56(10) | O(2)-Dy(1)-N(6) | 86.25(10)  |
| N(4)-Dy(1)-N(1)  | 171.75(8)  | O(2)-Dy(1)-O(1) | 52.13(8)   |
| N(5)-Dy(1)-N(1)  | 121.58(8)  | O(2)-Dy(1)-O(3) | 146.02(10) |
| N(5)-Dy(1)-N(2)  | 157.80(9)  | O(3)-Dy(1)-N(1) | 116.39(8)  |
| O(3)-Dy(1)-N(2)  | 77.81(9)   | O(4)-Dy(1)-N(2) | 83.58(8)   |
| O(3)-Dy(1)-N(3)  | 74.85(9)   | O(4)-Dy(1)-N(3) | 124.50(9)  |
| O(3)-Dy(1)-N(4)  | 71.41(8)   | O(4)-Dy(1)-N(4) | 112.95(8)  |
| O(3)-Dy(1)-N(5)  | 82.87(9)   | O(4)-Dy(1)-N(5) | 76.18(9)   |
| O(3)-Dy(1)-N(6)  | 126.26(9)  | O(4)-Dy(1)-N(6) | 76.53(9)   |
| O(3)-Dy(1)-O(1)  | 140.17(8)  | O(4)-Dy(1)-O(1) | 143.21(8)  |
| O(4)-Dy(1)-N(1)  | 74.97(8)   | O(4)-Dy(1)-O(2) | 143.52(9)  |
| N(3)-Dy(1)-C(30) | 81.31(11)  | O(4)-Dy(1)-O(3) | 53.77(8)   |

  

| Complex 2       |            |                 |            |
|-----------------|------------|-----------------|------------|
| Dy(1)-N(1)      | 2.564(4)   | Dy(2)-N(8)      | 2.613(4)   |
| Dy(1)-N(2)      | 2.498(4)   | Dy(2)-N(9)      | 2.625(4)   |
| Dy(1)-N(3)      | 2.610(4)   | Dy(2)-N(10)     | 2.501(4)   |
| Dy(1)-N(4)      | 2.591(4)   | Dy(2)-N(11)     | 2.574(5)   |
| Dy(1)-N(5)      | 2.521(4)   | Dy(2)-N(12)     | 2.598(5)   |
| Dy(1)-N(6)      | 2.576(4)   | Dy(2)-N(13)     | 2.529(5)   |
| Dy(1)-O(1)      | 2.215(4)   | Dy(2)-O(6)      | 2.221(3)   |
| Dy(1)-O(4)      | 2.423(4)   | Dy(2)-O(9)      | 2.364(4)   |
| Dy(1)-O(5)      | 2.378(4)   | Dy(2)-O(10)     | 2.478(4)   |
| N(1)-Dy(1)-N(3) | 113.14(15) | N(2)-Dy(1)-N(4) | 122.66(15) |
| N(1)-Dy(1)-N(4) | 143.97(14) | N(2)-Dy(1)-N(5) | 164.35(15) |
| N(1)-Dy(1)-N(6) | 61.50(15)  | N(2)-Dy(1)-N(6) | 121.55(15) |

|                   |            |                   |            |
|-------------------|------------|-------------------|------------|
| N(2)-Dy(1)-N(1)   | 62.48(16)  | N(4)-Dy(1)-N(3)   | 60.03(14)  |
| N(2)-Dy(1)-N(3)   | 62.65(15)  | N(5)-Dy(1)-N(1)   | 124.37(15) |
| N(5)-Dy(1)-N(3)   | 118.89(14) | N(5)-Dy(1)-N(4)   | 61.67(13)  |
| N(5)-Dy(1)-N(6)   | 62.88(14)  | N(6)-Dy(1)-N(3)   | 160.56(15) |
| N(6)-Dy(1)-N(4)   | 112.06(13) | O(1)-Dy(1)-N(1)   | 69.89(14)  |
| O(1)-Dy(1)-N(2)   | 92.08(15)  | O(1)-Dy(1)-N(3)   | 77.00(16)  |
| O(1)-Dy(1)-N(4)   | 74.21(15)  | O(1)-Dy(1)-N(5)   | 103.49(14) |
| O(1)-Dy(1)-N(6)   | 83.77(15)  | O(1)-Dy(1)-O(4)   | 142.97(15) |
| O(1)-Dy(1)-O(5)   | 146.13(15) | O(4)-Dy(1)-N(1)   | 74.06(14)  |
| O(4)-Dy(1)-N(2)   | 78.43(14)  | O(4)-Dy(1)-N(3)   | 126.34(15) |
| O(4)-Dy(1)-N(4)   | 140.52(14) | O(4)-Dy(1)-N(5)   | 89.83(14)  |
| O(4)-Dy(1)-N(6)   | 71.75(13)  | O(5)-Dy(1)-N(1)   | 136.65(14) |
| O(5)-Dy(1)-N(2)   | 87.12(15)  | O(5)-Dy(1)-N(3)   | 72.62(15)  |
| O(5)-Dy(1)-N(4)   | 77.84(14)  | O(5)-Dy(1)-N(5)   | 79.06(14)  |
| O(5)-Dy(1)-N(6)   | 124.93(14) | O(5)-Dy(1)-O(4)   | 69.83(14)  |
| N(8)-Dy(2)-N(9)   | 60.34(13)  | N(10)-Dy(2)-N(8)  | 123.47(14) |
| N(10)-Dy(2)-N(9)  | 63.13(13)  | N(10)-Dy(2)-N(11) | 62.39(14)  |
| N(10)-Dy(2)-N(12) | 121.02(15) | N(10)-Dy(2)-N(13) | 162.74(15) |
| N(11)-Dy(2)-N(8)  | 145.96(13) | N(11)-Dy(2)-N(9)  | 113.91(13) |
| N(11)-Dy(2)-N(12) | 61.51(15)  | N(12)-Dy(2)-N(8)  | 112.89(14) |
| N(12)-Dy(2)-N(9)  | 162.51(14) | N(13)-Dy(2)-N(8)  | 61.01(15)  |
| N(13)-Dy(2)-N(9)  | 118.39(15) | N(13)-Dy(2)-N(11) | 124.87(15) |
| N(13)-Dy(2)-N(12) | 63.36(16)  | O(6)-Dy(2)-N(8)   | 74.07(14)  |
| O(6)-Dy(2)-N(9)   | 80.67(13)  | O(6)-Dy(2)-N(10)  | 97.07(14)  |
| O(6)-Dy(2)-N(11)  | 71.89(13)  | O(6)-Dy(2)-N(12)  | 81.92(14)  |
| O(6)-Dy(2)-N(13)  | 100.14(14) | O(6)-Dy(2)-O(9)   | 151.01(14) |
| O(6)-Dy(2)-O(10)  | 141.35(15) | O(9)-Dy(2)-N(8)   | 81.38(14)  |
| O(9)-Dy(2)-N(9)   | 73.81(14)  | O(9)-Dy(2)-N(10)  | 83.64(14)  |
| O(9)-Dy(2)-N(11)  | 131.33(14) | O(9)-Dy(2)-N(12)  | 122.56(15) |
| O(9)-Dy(2)-N(13)  | 80.65(15)  | O(9)-Dy(2)-O(10)  | 67.05(15)  |
| O(10)-Dy(2)-N(8)  | 141.54(15) | O(10)-Dy(2)-N(9)  | 125.31(14) |
| O(10)-Dy(2)-N(10) | 75.69(14)  | O(10)-Dy(2)-N(11) | 71.23(14)  |
| O(10)-Dy(2)-N(12) | 70.68(15)  | O(10)-Dy(2)-N(13) | 91.55(15)  |

---

**Complex 3**

|            |          |                 |            |
|------------|----------|-----------------|------------|
| Dy(1)-O(1) | 2.223(3) | N(4)-Dy(1)-N(3) | 61.49(11)  |
| Dy(1)-O(4) | 2.166(3) | N(4)-Dy(1)-N(5) | 64.19(13)  |
| Dy(1)-N(8) | 2.580(3) | N(4)-Dy(1)-N(7) | 117.56(11) |
| Dy(1)-N(3) | 2.578(3) | N(5)-Dy(1)-N(8) | 61.35(12)  |
| Dy(1)-N(4) | 2.537(3) | N(5)-Dy(1)-N(3) | 117.18(11) |
| Dy(1)-N(5) | 2.575(4) | N(5)-Dy(1)-N(7) | 171.04(11) |
| Dy(1)-N(6) | 2.518(3) | N(6)-Dy(1)-N(8) | 61.68(12)  |
| Dy(1)-N(7) | 2.637(3) | N(6)-Dy(1)-N(7) | 62.70(10)  |

|                 |            |                 |            |
|-----------------|------------|-----------------|------------|
| O(1)-Dy(1)-N(8) | 74.02(10)  | N(6)-Dy(1)-N(3) | 122.94(11) |
| O(1)-Dy(1)-N(3) | 76.91(9)   | N(6)-Dy(1)-N(4) | 160.04(11) |
| O(1)-Dy(1)-N(4) | 100.51(11) | N(6)-Dy(1)-N(5) | 119.04(12) |
| O(1)-Dy(1)-N(5) | 84.38(11)  | O(4)-Dy(1)-N(5) | 90.10(12)  |
| O(1)-Dy(1)-N(6) | 99.43(11)  | O(4)-Dy(1)-N(6) | 80.23(11)  |
| O(1)-Dy(1)-N(7) | 86.66(9)   | O(4)-Dy(1)-N(7) | 98.85(11)  |
| O(4)-Dy(1)-O(1) | 173.49(11) | N(8)-Dy(1)-N(7) | 116.13(10) |
| O(4)-Dy(1)-N(8) | 100.30(11) | N(3)-Dy(1)-N(8) | 150.90(9)  |
| O(4)-Dy(1)-N(3) | 108.80(11) | N(3)-Dy(1)-N(7) | 60.25(9)   |
| O(4)-Dy(1)-N(4) | 80.07(11)  | N(4)-Dy(1)-N(8) | 125.54(12) |

**Table S3.** Hydrogen-bonded parameters (Å, °) for **2**.

| Complex  | D-H...A                   | d(D-H) | d(H...A) | d(D...A) | ∠(DHA) |
|----------|---------------------------|--------|----------|----------|--------|
| <b>2</b> | O4-H4A...O14 <sup>1</sup> | 0.88   | 2.02     | 2.887(7) | 173.0  |
|          | O4-H4B...O11              | 0.88   | 1.88     | 2.732(6) | 163.7  |
|          | O5-H5D...O11              | 0.90   | 1.83     | 2.680(7) | 157.3  |
|          | O5-H5E...O14A             | 0.90   | 1.94     | 2.753(9) | 150.2  |
|          | O9-H9A...O13 <sup>2</sup> | 0.91   | 1.79     | 2.605(6) | 148.3  |
|          | O9-H9B...O16 <sup>2</sup> | 0.91   | 2.02     | 2.836(8) | 149.8  |
|          | O11-H11A...O13            | 0.87   | 1.86     | 2.721(7) | 172.9  |
|          | O11-H11B...O16            | 0.87   | 2.05     | 2.876(9) | 157.7  |

<sup>1</sup>-1+X,+Y,+Z; <sup>2</sup>+X,1+Y,+Z

**Table S4.** Continuous Shape Measurements (CShMs) for Dy(III) ions in **1-3** by SHAPE 2.1.

| Configuration | ABOXIY, <b>1</b> | Configuration | ABOXIY, <b>2</b> |              | Configuration | ABOXIY, <b>3</b> |
|---------------|------------------|---------------|------------------|--------------|---------------|------------------|
| TD-10         | <b>2.109</b>     | MFF-9         | <b>3.472</b>     | <b>3.922</b> | HBPY-8        | <b>2.967</b>     |
| OBPY-10       | 15.997           | HBPY-9        | 15.015           | 14.197       | CU-8          | 11.348           |
| PPR-10        | 11.076           | JTC-9         | 13.524           | 14.078       | SAPR-8        | 15.328           |
| PAPR-10       | 11.438           | JCCU-9        | 6.264            | 6.119        | TDD-8         | 13.946           |
| JBCCU-10      | 8.742            | CCU-9         | 5.250            | 5.093        | JGBF-8        | 4.301            |
| JBCSAPR-10    | 3.927            | JCSAPR-9      | 6.178            | 6.526        | JETBPY-8      | 22.513           |
| JMBIC-10      | 6.804            | CSAPR-9       | 4.957            | 5.288        | JBTPR-8       | 14.115           |
| JATDI-10      | 18.459           | JTCTPR-9      | 5.828            | 6.452        | BTPR-8        | 13.933           |
| JSPC-10       | 2.550            | TCTPR-9       | 6.093            | 6.301        | JSD-8         | 13.437           |
| SDD-10        | 2.671            | JTDIC-9       | 11.462           | 11.813       | TT-8          | 11.954           |
| HD-10         | 6.366            | HH-9          | 4.051            | 3.697        | ETBPY-8       | 19.926           |

**Table S5.** Relaxation fitting parameters from least-squares fitting of  $\chi(f)$  data under 1000 Oe dc field of 1.

| $T(K)$ | $\chi_r$ | $\chi_s$               | $\alpha$ |
|--------|----------|------------------------|----------|
| 3      | 1.197    | 0.358                  | 0.515    |
| 3.5    | 0.985    | 0.380                  | 0.376    |
| 4      | 0.854    | 0.366                  | 0.275    |
| 4.5    | 0.761    | 0.343                  | 0.225    |
| 5      | 0.687    | 0.331                  | 0.197    |
| 5.5    | 0.626    | 0.320                  | 0.189    |
| 6      | 0.575    | 0.280                  | 0.212    |
| 6.5    | 0.535    | $3.16 \times 10^{-08}$ | 0.322    |
| 7      | 0.497    | $5.03 \times 10^{-08}$ | 0.342    |
| 7.5    | 0.466    | $3.85 \times 10^{-08}$ | 0.438    |
| 8      | 0.438    | $7.44 \times 10^{-08}$ | 0.559    |

**Table S6.** Relaxation fitting parameters from least-squares fitting of  $\chi(f)$  data under 1000 Oe dc field of 2.

| $T(K)$ | $\chi_r$ | $\chi_s$ | $\alpha$ |
|--------|----------|----------|----------|
| 5      | 2.149    | 0.957    | 0.367    |
| 5.5    | 1.949    | 0.923    | 0.329    |
| 6      | 1.787    | 0.870    | 0.308    |
| 6.5    | 1.650    | 0.814    | 0.293    |
| 7      | 1.531    | 0.709    | 0.319    |
| 8      | 1.342    | 0.652    | 0.284    |
| 9      | 1.197    | 0.538    | 0.281    |
| 10     | 1.071    | 0.388    | 0.262    |

**Table S7.** Relaxation fitting parameters from least-squares fitting of  $\chi(f)$  data under 500 Oe dc field of 3.

| $T(K)$ | $\chi_r$ | $\chi_s$ | $\alpha$ |
|--------|----------|----------|----------|
| 2      | 2.613    | 0.106    | 0.309    |
| 2.5    | 2.151    | 0.090    | 0.217    |
| 3      | 1.841    | 0.074    | 0.169    |
| 3.5    | 1.598    | 0.062    | 0.143    |
| 4      | 1.405    | 0.051    | 0.126    |
| 4.5    | 1.255    | 0.041    | 0.118    |
| 5      | 1.132    | 0.033    | 0.116    |
| 5.5    | 1.030    | 0.030    | 0.114    |
| 6      | 0.947    | 0.039    | 0.113    |
| 6.5    | 0.875    | 0.067    | 0.104    |

**Table S8.** Calculated energy levels ( $\text{cm}^{-1}$ ) and  $g$  ( $g_x, g_y, g_z$ ) tensors and  $\tau_{\text{QTM}}$  (s) of the lowest eight Kramers doublets (KDs) of **1**, **1a**, **2a**, **2b** and **3** using CASSCF/RASSI-SO with ORCA.

|           | KDs             | $E/\text{cm}^{-1}$ | $g_x$    | $g_y$  | $g_z$   | $g_z \text{ Angle}/^\circ$ | $\tau_{\text{QTM}}/\text{s}$ |
|-----------|-----------------|--------------------|----------|--------|---------|----------------------------|------------------------------|
| <b>1</b>  | KD <sub>0</sub> | 0.000              | 0.0086   | 0.0300 | 19.8911 | --                         | $7.728 \times 10^{-5}$       |
|           | KD <sub>1</sub> | 135.381            | 0.3403   | 0.4595 | 16.8836 | 101.00                     | $1.846 \times 10^{-7}$       |
|           | KD <sub>2</sub> | 172.720            | 1.1244   | 2.1609 | 11.8082 | 104.89                     | $7.259 \times 10^{-9}$       |
|           | KD <sub>3</sub> | 198.838            | 9.3681   | 6.6819 | 1.7220  | 87.79                      | $3.139 \times 10^{-10}$      |
|           | KD <sub>4</sub> | 249.730            | 1.9616   | 2.6386 | 14.4972 | 55.38                      | $4.912 \times 10^{-9}$       |
|           | KD <sub>5</sub> | 302.777            | 0.2839   | 2.2431 | 16.6458 | 89.59                      | $1.174 \times 10^{-8}$       |
|           | KD <sub>6</sub> | 334.879            | 0.0214   | 1.3888 | 12.7757 | 84.46                      | $2.379 \times 10^{-8}$       |
|           | KD <sub>7</sub> | 363.346            | 0.3024   | 3.9791 | 15.1564 | 87.99                      | $3.516 \times 10^{-9}$       |
| <b>1a</b> | KD <sub>0</sub> | 0.000              | 0.0000   | 0.0000 | 19.9828 | --                         | $9.792 \times 10^5$          |
|           | KD <sub>1</sub> | 452.728            | 0.0000   | 0.0000 | 17.0576 | 1.51                       | $3.842 \times 10^3$          |
|           | KD <sub>2</sub> | 773.849            | 0.0001   | 0.0001 | 14.3403 | 0.61                       | 1.324                        |
|           | KD <sub>3</sub> | 1026.546           | 0.0027   | 0.0029 | 11.6860 | 3.31                       | $2.616 \times 10^{-3}$       |
|           | KD <sub>4</sub> | 1249.325           | 0.0332   | 0.0379 | 9.0535  | 7.34                       | $1.274 \times 10^{-5}$       |
|           | KD <sub>5</sub> | 1447.014           | 0.3208   | 0.3837 | 6.4078  | 9.92                       | $9.177 \times 10^{-8}$       |
|           | KD <sub>6</sub> | 1601.640           | 2.5461   | 3.0726 | 3.8224  | 27.72                      | $1.240 \times 10^{-9}$       |
|           | KD <sub>7</sub> | 1692.073           | 13.39237 | 7.6377 | 1.1692  | 2.14                       | $2.324 \times 10^{-10}$      |
| <b>2a</b> | KD <sub>0</sub> | 0.000              | 0.0315   | 0.1340 | 19.4796 | --                         | $7.620 \times 10^{-5}$       |
|           | KD <sub>1</sub> | 82.844             | 0.0745   | 0.2004 | 18.6284 | 63.77                      | $1.456 \times 10^{-6}$       |
|           | KD <sub>2</sub> | 132.402            | 0.2838   | 0.9402 | 16.9403 | 132.41                     | $6.284 \times 10^{-8}$       |
|           | KD <sub>3</sub> | 170.564            | 1.5215   | 1.9508 | 16.4952 | 98.86                      | $9.735 \times 10^{-9}$       |
|           | KD <sub>4</sub> | 225.652            | 1.5268   | 2.0777 | 14.9452 | 37.88                      | $8.150 \times 10^{-9}$       |
|           | KD <sub>5</sub> | 258.999            | 4.6775   | 6.0662 | 8.5471  | 122.22                     | $6.988 \times 10^{-10}$      |
|           | KD <sub>6</sub> | 332.885            | 0.9674   | 1.0154 | 17.3019 | 115.89                     | $3.153 \times 10^{-8}$       |
|           | KD <sub>7</sub> | 395.283            | 0.1497   | 0.1774 | 18.9796 | 113.62                     | $1.258 \times 10^{-6}$       |
| <b>2b</b> | KD <sub>0</sub> | 0.000              | 0.1316   | 0.1398 | 19.5184 | --                         | $1.892 \times 10^{-6}$       |
|           | KD <sub>1</sub> | 92.678             | 0.1860   | 0.2914 | 19.1371 | 121.10                     | $5.721 \times 10^{-7}$       |
|           | KD <sub>2</sub> | 162.085            | 1.2929   | 2.8965 | 14.9207 | 41.31                      | $5.416 \times 10^{-9}$       |
|           | KD <sub>3</sub> | 193.599            | 0.9151   | 3.2440 | 15.4659 | 103.21                     | $4.977 \times 10^{-9}$       |
|           | KD <sub>4</sub> | 236.840            | 1.4818   | 4.8019 | 11.1230 | 135.31                     | $1.727 \times 10^{-9}$       |
|           | KD <sub>5</sub> | 296.235            | 1.9574   | 5.2631 | 9.7676  | 84.52                      | $1.276 \times 10^{-9}$       |
|           | KD <sub>6</sub> | 355.129            | 1.5686   | 2.7542 | 15.9311 | 57.95                      | $5.776 \times 10^{-9}$       |
|           | KD <sub>7</sub> | 453.361            | 0.1594   | 0.2672 | 19.1980 | 71.29                      | $7.087 \times 10^{-7}$       |
| <b>3</b>  | KD <sub>0</sub> | 0.000              | 0.0181   | 0.0280 | 19.9138 | --                         | $6.417 \times 10^{-5}$       |
|           | KD <sub>1</sub> | 291.753            | 1.3189   | 2.2459 | 15.6436 | 2.01                       | $8.352 \times 10^{-9}$       |
|           | KD <sub>2</sub> | 416.542            | 1.0787   | 2.9242 | 13.8248 | 93.39                      | $5.211 \times 10^{-9}$       |
|           | KD <sub>3</sub> | 505.181            | 3.1951   | 4.2268 | 11.6370 | 82.12                      | $1.627 \times 10^{-9}$       |



|                 |         |        |        |         |        |                           |
|-----------------|---------|--------|--------|---------|--------|---------------------------|
| KD <sub>4</sub> | 553.397 | 0.1087 | 1.8287 | 9.2537  | 93.11  | 1.004 × 10 <sup>-8</sup>  |
| KD <sub>5</sub> | 579.551 | 4.3609 | 5.2768 | 8.7172  | 109.40 | 8.449 × 10 <sup>-10</sup> |
| KD <sub>6</sub> | 677.018 | 5.0112 | 5.1992 | 10.0056 | 92.32  | 8.453 × 10 <sup>-10</sup> |
| KD <sub>7</sub> | 739.008 | 0.3545 | 1.0256 | 16.3616 | 77.66  | 4.957 × 10 <sup>-8</sup>  |

**Table S9.** Wave functions with definite projection of the total moment  $|m_j\rangle$  for the lowest eight KDs of **1**, **1a**, **2a**, **2b** and **3** using CASSCF/RASSI-SO with ORCA.

|           | $E/\text{cm}^{-1}$ | wave functions                                                                                                                                                                       |
|-----------|--------------------|--------------------------------------------------------------------------------------------------------------------------------------------------------------------------------------|
| <b>1</b>  | 0.000              | 99.4% $ \pm 15/2\rangle$                                                                                                                                                             |
|           | 135.381            | 6.4% $ \pm 13/2\rangle$ + 20.9% $ \pm 9/2\rangle$ + 32.2% $ \pm 7/2\rangle$ + 25.7% $ \pm 5/2\rangle$ + 10.5% $ \pm 3/2\rangle$                                                      |
|           | 172.720            | 26.1% $ \pm 13/2\rangle$ + 24.4% $ \pm 11/2\rangle$ + 18.7% $ \pm 9/2\rangle$ + 10.8% $ \pm 7/2\rangle$ + 4.2% $ \pm 5/2\rangle$ + 5.1% $ \pm 3/2\rangle$ + 10.8%                    |
|           | 198.838            | 49.0% $ \pm 13/2\rangle$ + 6.4% $ \pm 11/2\rangle$ + 22.6% $ \pm 9/2\rangle$ + 11.9% $ \pm 7/2\rangle$ + 4.9% $ \pm 5/2\rangle$ + 4.1% $ \pm 3/2\rangle$                             |
|           | 249.730            | 17.9% $ \pm 13/2\rangle$ + 45.1% $ \pm 11/2\rangle$ + 12.6% $ \pm 9/2\rangle$ + 6.4% $ \pm 7/2\rangle$ + 5.7% $ \pm 5/2\rangle$ + 5.4% $ \pm 3/2\rangle$ + 6.7% $ \pm 1/2\rangle$    |
|           | 302.777            | 23.3% $ \pm 7/2\rangle$ + 43.6% $ \pm 5/2\rangle$ + 22.2% $ \pm 3/2\rangle$ + 7.0% $ \pm 1/2\rangle$                                                                                 |
|           | 334.879            | 3.0% $ \pm 11/2\rangle$ + 18.0% $ \pm 9/2\rangle$ + 13.8% $ \pm 7/2\rangle$ + 10.3% $ \pm 5/2\rangle$ + 35.5% $ \pm 3/2\rangle$ + 18.6% $ \pm 1/2\rangle$                            |
|           | 363.346            | 3.6% $ \pm 13/2\rangle$ + 13.3% $ \pm 11/2\rangle$ + 5.1% $ \pm 9/2\rangle$ + 5.7% $ \pm 5/2\rangle$ + 16.9% $ \pm 3/2\rangle$ + 53.8% $ \pm 1/2\rangle$                             |
| <b>1a</b> | 0.000              | 100.0% $ \pm 15/2\rangle$                                                                                                                                                            |
|           | 452.728            | 99.8% $ \pm 13/2\rangle$                                                                                                                                                             |
|           | 773.849            | 99.5% $ \pm 11/2\rangle$                                                                                                                                                             |
|           | 1026.546           | 99.3% $ \pm 9/2\rangle$                                                                                                                                                              |
|           | 1249.325           | 99.0% $ \pm 7/2\rangle$                                                                                                                                                              |
|           | 1447.014           | 97.5% $ \pm 5/2\rangle$                                                                                                                                                              |
|           | 1601.640           | 94.0% $ \pm 3/2\rangle$ + 4.4% $ \pm 1/2\rangle$                                                                                                                                     |
|           | 1692.073           | 4.2% $ \pm 3/2\rangle$ + 95.2% $ \pm 1/2\rangle$                                                                                                                                     |
| <b>2a</b> | 0.000              | 95.2% $ \pm 15/2\rangle$ + 2.8% $ \pm 9/2\rangle$                                                                                                                                    |
|           | 82.844             | 7.9% $ \pm 11/2\rangle$ + 19.7% $ \pm 9/2\rangle$ + 32.5% $ \pm 7/2\rangle$ + 27.5% $ \pm 5/2\rangle$ + 8.9% $ \pm 3/2\rangle$                                                       |
|           | 132.402            | 33.3% $ \pm 13/2\rangle$ + 18.2% $ \pm 11/2\rangle$ + 8.3% $ \pm 9/2\rangle$ + 16.6% $ \pm 7/2\rangle$ + 16.5% $ \pm 5/2\rangle$ + 7.4% $ \pm 3/2\rangle$                            |
|           | 170.564            | 20.3% $ \pm 11/2\rangle$ + 11.8% $ \pm 7/2\rangle$ + 6.0% $ \pm 5/2\rangle$ + 29.0% $ \pm 3/2\rangle$ + 26.4% $ \pm 1/2\rangle$                                                      |
|           | 225.652            | 29.7% $ \pm 13/2\rangle$ + 37.6% $ \pm 11/2\rangle$ + 14.3% $ \pm 5/2\rangle$ + 6.8% $ \pm 3/2\rangle$ + 10.0% $ \pm 1/2\rangle$                                                     |
|           | 258.999            | 19.7% $ \pm 13/2\rangle$ + 4.1% $ \pm 11/2\rangle$ + 26.9% $ \pm 9/2\rangle$ + 3.7% $ \pm 7/2\rangle$ + 4.2% $ \pm 5/2\rangle$ + 14.2% $ \pm 3/2\rangle$ + 26.1% $ \pm 1/2\rangle$   |
|           | 332.885            | 9.2% $ \pm 13/2\rangle$ + 15.2% $ \pm 11/2\rangle$ + 8.0% $ \pm 9/2\rangle$ + 19.2% $ \pm 7/2\rangle$ + 11.7% $ \pm 5/2\rangle$ + 15.1% $ \pm 3/2\rangle$ + 20.6% $ \pm 1/2\rangle$  |
|           | 395.283            | 4.8% $ \pm 13/2\rangle$ + 14.8% $ \pm 11/2\rangle$ + 12.6% $ \pm 9/2\rangle$ + 14.6% $ \pm 7/2\rangle$ + 19.6% $ \pm 5/2\rangle$ + 18.6% $ \pm 3/2\rangle$ + 14.6% $ \pm 1/2\rangle$ |
| <b>2b</b> | 0.000              | 95.9% $ \pm 15/2\rangle$ + 2.6% $ \pm 7/2\rangle$                                                                                                                                    |
|           | 92.678             | 5.9% $ \pm 13/2\rangle$ + 12.4% $ \pm 11/2\rangle$ + 27.1% $ \pm 9/2\rangle$ + 24.5% $ \pm 7/2\rangle$ + 21.6% $ \pm 5/2\rangle$ + 5.7% $ \pm 3/2\rangle$                            |
|           | 162.085            | 38.9% $ \pm 13/2\rangle$ + 13.7% $ \pm 11/2\rangle$ + 18.3% $ \pm 7/2\rangle$ + 18.0% $ \pm 5/2\rangle$ + 11.3% $ \pm 3/2\rangle$ + 4.3% $ \pm 1/2\rangle$                           |

|          |                                                                                                         |
|----------|---------------------------------------------------------------------------------------------------------|
| 193.599  | 3.9%  ±13/2> + 8.4%  ±11/2> + 19.4%  ±9/2> + 11.1%  ±7/2> + 7.7%  ±5/2> + 29.9%  ±3/2> + 18.8%  ±1/2>   |
| 236.840  | 20.8%  ±13/2> + 28.9%  ±11/2> + 3.4%  ±9/2> + 17.5%  ±5/2> + 23.3%  ±1/2>                               |
| 296.235  | 15.6%  ±13/2> + 24.9%  ±9/2> + 7.7%  ±7/2> + 8.8%  ±5/2> + 25.5%  ±3/2> + 15.1%  ±1/2>                  |
| 355.129  | 10.5%  ±13/2> + 23.4%  ±11/2> + 12.0%  ±9/2> + 19.0%  ±7/2> + 9.8%  ±5/2> + 6.0%  ±3/2> + 18.6%  ±1/2>  |
| 453.361  | 4.4%  ±13/2> + 11.4%  ±11/2> + 10.0%  ±9/2> + 12.5%  ±7/2> + 18.4%  ±5/2> + 21.5%  ±3/2> + 21.4%  ±1/2> |
| 0.000    | 99.6%  ±15/2>                                                                                           |
| 291.753  | 90.3%  ±13/2> + 6.6%  ±1/2>                                                                             |
| 416.542  | 7.8%  ±13/2> + 17.8%  ±11/2> + 3.0%  ±9/2> + 3.9%  ±7/2> + 6.3%  ±5/2> + 20.1%  ±3/2> + 40.9%  ±1/2>    |
| <b>3</b> |                                                                                                         |
| 505.181  | 21.7%  ±11/2> + 12.4%  ±9/2> + 3.0%  ±7/2> + 46.1%  ±3/2> + 14.8%  ±1/2>                                |
| 553.397  | 20.1%  ±11/2> + 15.1%  ±7/2> + 52.7%  ±5/2> + 8.3%  ±3/2>                                               |
| 579.551  | 35.4%  ±11/2> + 6.4%  ±9/2> + 15.0%  ±7/2> + 6.2%  ±5/2> + 4.9%  ±3/2> + 31.3%  ±1/2>                   |
| 677.018  | 3.3%  ±11/2> + 58.4%  ±9/2> + 15.3%  ±7/2> + 5.7%  ±5/2> + 13.2%  ±3/2> + 3.6%  ±1/2>                   |
| 739.008  | 17.5%  ±9/2> + 47.4%  ±7/2> + 26.8%  ±5/2> + 6.5%  ±3/2>                                                |

**Table S10.** Mulliken atomic charge on the metal atoms and donor atoms in the ground state of **1**, **1a**, **2a**, **2b** and **3** calculated within B3LYP-D3/DKH-def2-TZVP level.

|    | <b>1</b> | <b>1a</b> | <b>2a</b> | <b>2b</b> | <b>3</b> |     |         |    |         |
|----|----------|-----------|-----------|-----------|----------|-----|---------|----|---------|
| Dy | 1.9499   | Dy        | 1.7250    | Dy1       | 1.7571   | Dy2 | 1.6794  | Dy | 1.9386  |
| N1 | -0.2872  | O1        | -0.4669   | N1        | -0.4084  | N8  | -0.4347 | N3 | -0.3326 |
| N2 | -0.3082  | O2        | -0.4839   | N2        | -0.3905  | N9  | -0.3679 | N4 | -0.3268 |
| N3 | -0.2988  | O3        | -0.4715   | N3        | -0.3473  | N10 | -0.4024 | N5 | -0.2934 |
| N4 | -0.2933  | O4        | -0.4736   | N4        | -0.4276  | N11 | -0.3907 | N6 | -0.3175 |
| N5 | -0.3227  |           |           | N5        | -0.3893  | N12 | -0.4251 | N7 | -0.3092 |
| N6 | -0.3040  |           |           | N6        | -0.3321  | N13 | -0.3778 | N8 | -0.3055 |
| O1 | -0.4997  |           |           | O1        | -0.6430  | O6  | -0.6464 | O1 | -0.7185 |
| O2 | -0.5274  |           |           | O4        | -0.5217  | O9  | -0.5806 | O4 | -0.6931 |
| O3 | -0.5157  |           |           | O5        | -0.5787  | O10 | -0.5765 |    |         |
| O4 | -0.5237  |           |           |           |          |     |         |    |         |

**Table S11.** Mulliken spin density of **1**, **1a**, **2a**, **2b** and **3**.

| <b>1</b> |              | <b>1a</b> |              | <b>2a</b> |              | <b>2b</b> |              | <b>3</b> |              |
|----------|--------------|-----------|--------------|-----------|--------------|-----------|--------------|----------|--------------|
| Atoms    | Spin density | Atoms     | Spin density | Atoms     | Spin density | Atoms     | Spin density | Atoms    | Spin density |
| Dy       | 5.0218       | Dy        | 4.9766       | Dy        | 5.0178       | Dy        | 5.0124       | Dy       | 5.0022       |
| N1       | -0.0016      | O1        | 0.0084       | N1        | -0.2816      | N1        | -0.2859      | N1       | -0.0031      |
| N2       | -0.0038      | O2        | 0.0068       | N2        | -0.1506      | N2        | -0.0830      | N2       | -0.0024      |
| N3       | -0.0040      | O3        | -0.0023      | N3        | 0.0966       | N3        | 0.0970       | N3       | -0.0027      |
| N4       | -0.0018      | O4        | 0.0135       | N4        | 0.2717       | N4        | 0.2922       | N4       | -0.0026      |
| N5       | -0.0039      |           |              | N5        | 0.0981       | N5        | 0.1067       | N5       | -0.0016      |
| N6       | -0.0033      |           |              | N6        | -0.0629      | N6        | -0.1266      | N6       | -0.0027      |
| O7       | -0.0034      |           |              | O7        | -0.0051      | O7        | -0.0019      | O7       | 0.0024       |
| O8       | -0.0021      |           |              | O8        | 0.0075       | O8        | -0.0061      | O8       | 0.0011       |
| O9       | -0.0020      |           |              | O9        | 0.0025       | O9        | 0.0029       |          |              |
| O10      | -0.0025      |           |              |           |              |           |              |          |              |

**Table S12.** Calculated crystal field parameters  $B(k, q)$  for **1**, **1a**, **2a**, **2b** and **3** using CASSCF/RASSI-SO with ORCA.

| k | q  | $B_k^q$                |                        |                        |                        |                        |
|---|----|------------------------|------------------------|------------------------|------------------------|------------------------|
|   |    | <b>1</b>               | <b>1a</b>              | <b>2a</b>              | <b>2b</b>              | <b>3</b>               |
| 2 | -2 | 1.55                   | -1.65                  | -2.03                  | -1.37                  | $-1.47 \times 10^{-1}$ |
| 2 | -1 | $9.51 \times 10^{-1}$  | $4.48 \times 10^{-2}$  | 5.45                   | 4.67                   | $-1.71 \times 10^{-1}$ |
| 2 | 0  | -3.21                  | -22.50                 | -2.01                  | -2.39                  | -2.87                  |
| 2 | 1  | $3.61 \times 10^{-1}$  | $-1.88 \times 10^{-1}$ | $8.52 \times 10^{-1}$  | 5.67                   | $-7.48 \times 10^{-1}$ |
| 2 | 2  | $5.25 \times 10^{-2}$  | $5.58 \times 10^{-1}$  | $8.91 \times 10^{-1}$  | -3.14                  | 1.24                   |
| 4 | -4 | $-8.09 \times 10^{-3}$ | $-3.17 \times 10^{-3}$ | $1.39 \times 10^{-1}$  | $-6.18 \times 10^{-2}$ | $-2.18 \times 10^{-4}$ |
| 4 | -3 | $4.06 \times 10^{-3}$  | $2.62 \times 10^{-3}$  | $2.58 \times 10^{-1}$  | $-3.08 \times 10^{-1}$ | $-3.61 \times 10^{-3}$ |
| 4 | -2 | $-2.37 \times 10^{-4}$ | $-2.31 \times 10^{-2}$ | $-4.34 \times 10^{-2}$ | $-1.01 \times 10^{-1}$ | $-1.35 \times 10^{-3}$ |
| 4 | -1 | $-6.39 \times 10^{-3}$ | $-1.94 \times 10^{-2}$ | $-8.46 \times 10^{-2}$ | $-3.70 \times 10^{-2}$ | $3.43 \times 10^{-3}$  |
| 4 | 0  | $-1.76 \times 10^{-2}$ | $-4.06 \times 10^{-3}$ | $-2.39 \times 10^{-2}$ | $-2.48 \times 10^{-2}$ | $-1.18 \times 10^{-2}$ |
| 4 | 1  | $1.07 \times 10^{-2}$  | $3.95 \times 10^{-2}$  | $4.58 \times 10^{-2}$  | $-4.09 \times 10^{-2}$ | $5.01 \times 10^{-3}$  |
| 4 | 2  | $-7.82 \times 10^{-3}$ | $1.39 \times 10^{-02}$ | $8.29 \times 10^{-2}$  | $-1.26 \times 10^{-2}$ | $-3.02 \times 10^{-4}$ |
| 4 | 3  | $-3.47 \times 10^{-3}$ | $-2.82 \times 10^{-2}$ | $2.24 \times 10^{-1}$  | $3.48 \times 10^{-2}$  | $-7.83 \times 10^{-4}$ |
| 4 | 4  | $-3.32 \times 10^{-2}$ | $6.61 \times 10^{-3}$  | $-3.84 \times 10^{-2}$ | $1.61 \times 10^{-1}$  | $-8.45 \times 10^{-3}$ |
| 6 | -6 | $1.45 \times 10^{-2}$  | $1.88 \times 10^{-05}$ | $4.30 \times 10^{-3}$  | $-4.37 \times 10^{-3}$ | $-7.29 \times 10^{-4}$ |
| 6 | -5 | $-5.60 \times 10^{-4}$ | $-3.92 \times 10^{-5}$ | $-2.61 \times 10^{-3}$ | $-2.73 \times 10^{-4}$ | $-1.97 \times 10^{-4}$ |
| 6 | -4 | $-4.73 \times 10^{-4}$ | $-1.64 \times 10^{-4}$ | $2.90 \times 10^{-3}$  | $-1.43 \times 10^{-3}$ | $-1.28 \times 10^{-5}$ |
| 6 | -3 | $4.73 \times 10^{-4}$  | $-1.09 \times 10^{-4}$ | $5.26 \times 10^{-3}$  | $-8.78 \times 10^{-3}$ | $1.58 \times 10^{-5}$  |
| 6 | -2 | $-1.73 \times 10^{-3}$ | $9.99 \times 10^{-4}$  | $2.19 \times 10^{-3}$  | $3.99 \times 10^{-3}$  | $-7.13 \times 10^{-5}$ |
| 6 | -1 | $-4.76 \times 10^{-3}$ | $1.16 \times 10^{-3}$  | $9.98 \times 10^{-3}$  | $5.71 \times 10^{-3}$  | $-4.08 \times 10^{-5}$ |
| 6 | 0  | $-8.67 \times 10^{-4}$ | $-7.71 \times 10^{-4}$ | $-5.27 \times 10^{-4}$ | $-7.56 \times 10^{-4}$ | $2.99 \times 10^{-5}$  |
| 6 | 1  | $-7.66 \times 10^{-4}$ | $-2.23 \times 10^{-3}$ | $4.15 \times 10^{-3}$  | $5.69 \times 10^{-3}$  | $-1.31 \times 10^{-6}$ |
| 6 | 2  | $1.36 \times 10^{-3}$  | $-6.50 \times 10^{-4}$ | $-3.54 \times 10^{-3}$ | $1.83 \times 10^{-3}$  | $1.30 \times 10^{-5}$  |
| 6 | 3  | $9.06 \times 10^{-4}$  | $9.46 \times 10^{-4}$  | $9.26 \times 10^{-3}$  | $4.60 \times 10^{-3}$  | $-3.17 \times 10^{-5}$ |
| 6 | 4  | $1.67 \times 10^{-3}$  | $2.01 \times 10^{-4}$  | $-1.28 \times 10^{-3}$ | $4.46 \times 10^{-3}$  | $-8.05 \times 10^{-5}$ |

|   |   |                        |                       |                       |                        |                        |
|---|---|------------------------|-----------------------|-----------------------|------------------------|------------------------|
| 6 | 5 | $-7.76 \times 10^{-3}$ | $1.27 \times 10^{-5}$ | $1.37 \times 10^{-3}$ | $2.41 \times 10^{-3}$  | $-2.96 \times 10^{-5}$ |
| 6 | 6 | $-3.00 \times 10^{-3}$ | $1.09 \times 10^{-5}$ | $4.09 \times 10^{-3}$ | $-3.76 \times 10^{-3}$ | $1.06 \times 10^{-4}$  |

---

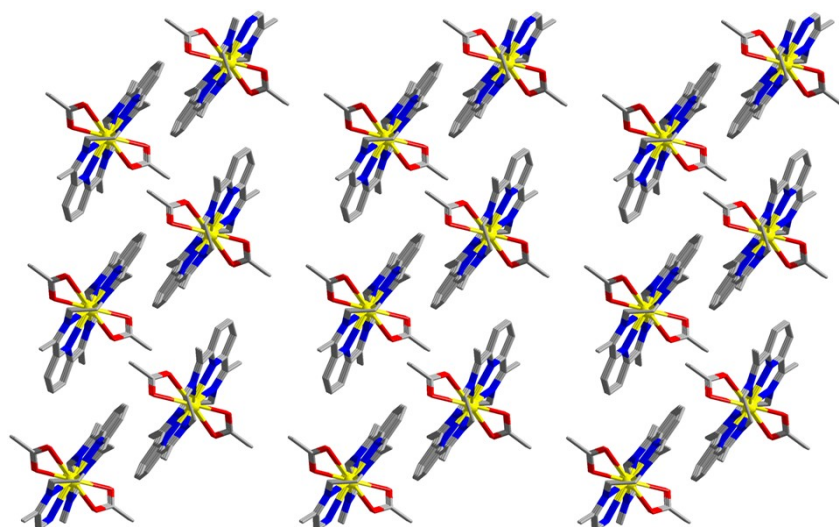

**Fig. S1** Crystal packing diagram for complex **1**. All hydrogen atoms, solvent molecules, and the counter ion  $[\text{BPh}_4]^+$  for **1** are omitted for clarity.

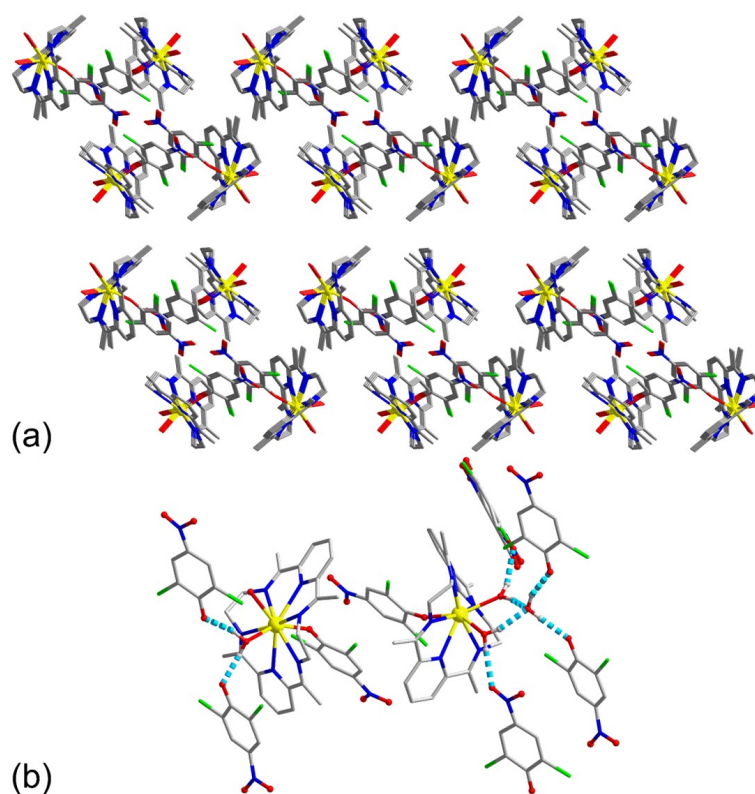

**Fig. S2** (a) Crystal packing diagram for complex **2**. All hydrogen atoms (except for the H atoms in the H-bonds), solvent molecules, and the counter ion  $[\text{PF}_6]^-$  for **2** are omitted for clarity. (b) Hydrogen bonding in complex **2** (the dashed line represents the interaction).

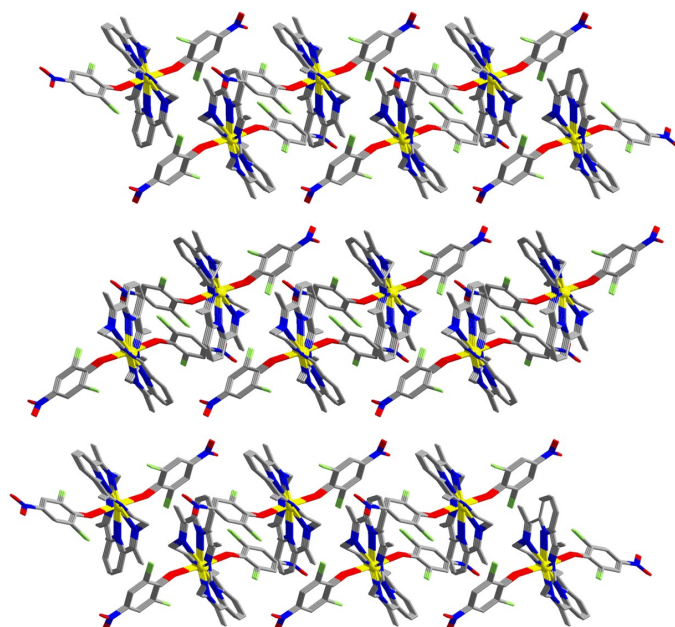

**Fig. S3** Crystal packing diagram for complex **3**. All hydrogen atoms, solvent molecules, and the counter ion  $[\text{BPh}_4]^-$  for **3** are omitted for clarity.

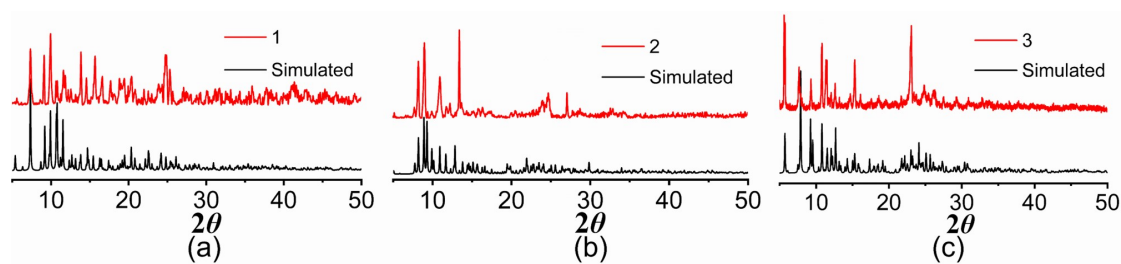

Fig. S4 PXRD curves of **1** (a), **2** (b) and **3** (c).

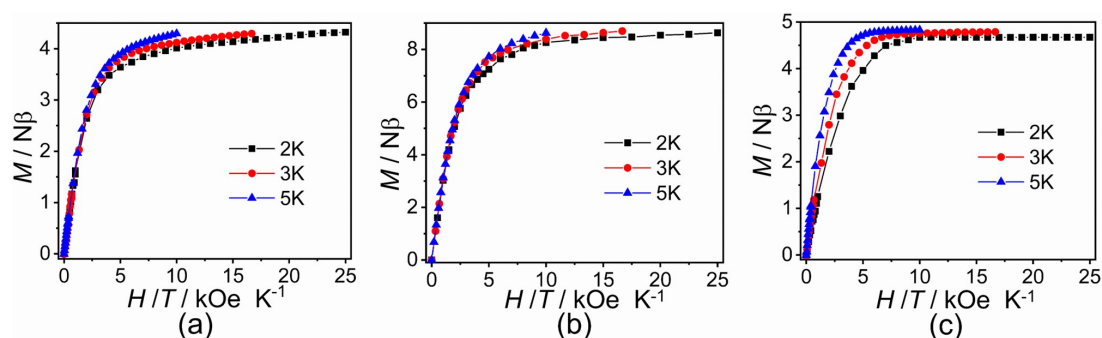

Fig. S5  $M$  vs  $H/T$  curves for **1** (a), **2** (b) and **3** (c) at indicated temperatures.

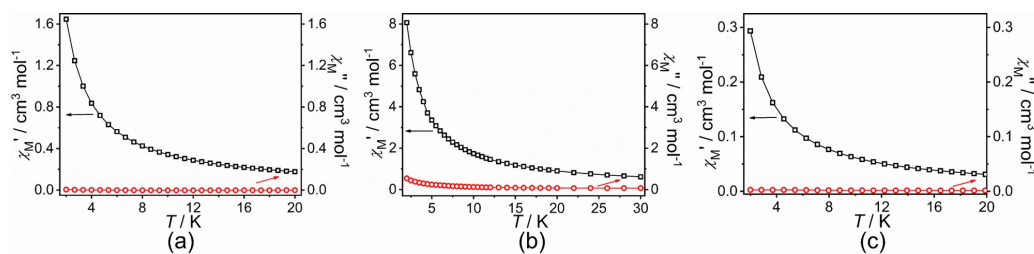

Fig. S6 AC magnetic susceptibility measurements for **1** (a), **2** (b) and **3** (c) in zero static field.

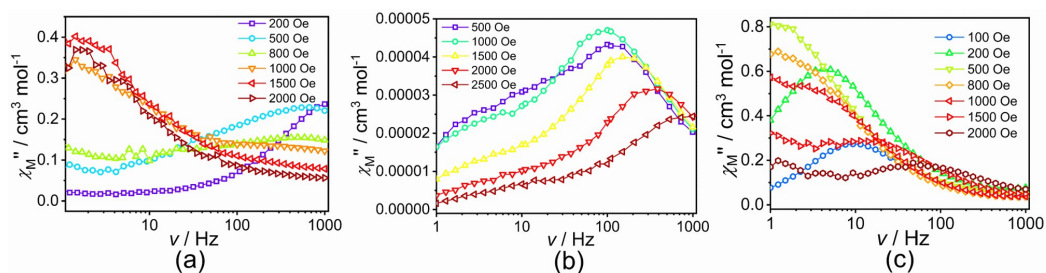

Fig. S7 Frequency dependence of  $\chi''_M$  susceptibilities for **1** (a), **2** (b) and **3** (c) under different dc fields.

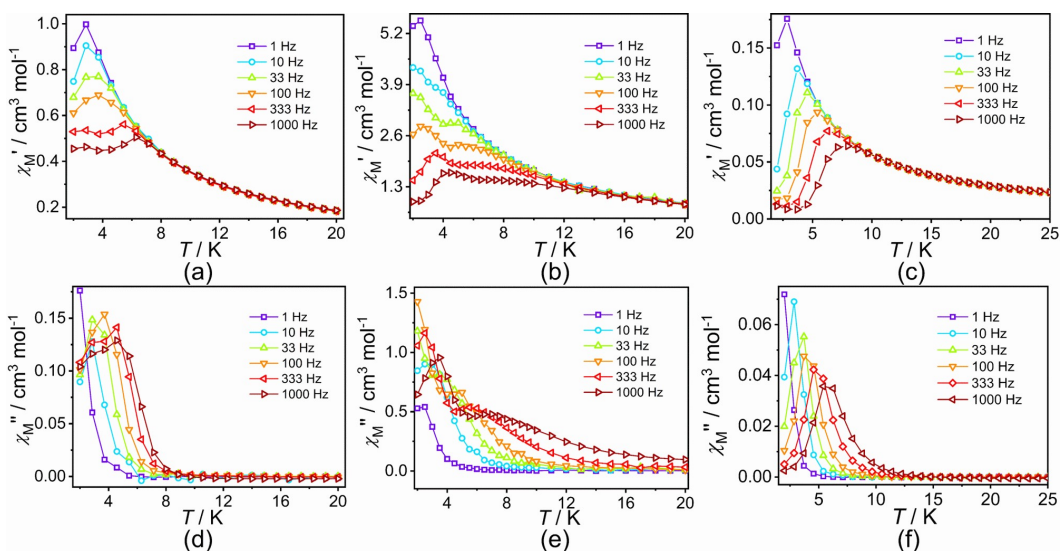

**Fig. S8** Temperature dependence of the in-phase ( $\chi'_M$ , top) and out-of-phase ( $\chi''_M$ , bottom) ac susceptibilities at different frequencies under the external dc fields for complexes **1** (a, d), **2** (b, e) and **3** (c, f).

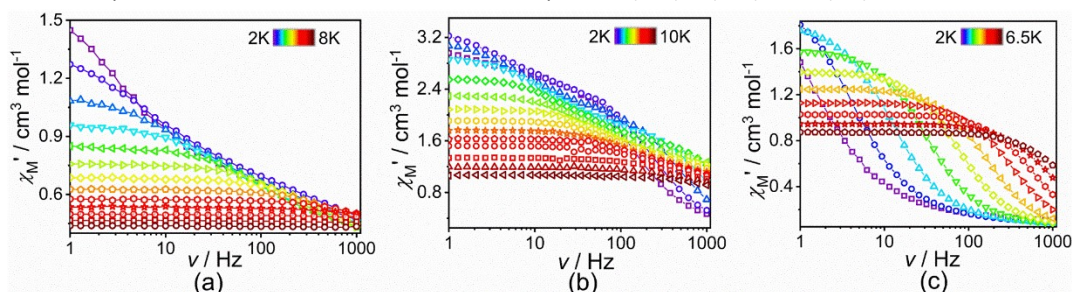

**Fig. S9** Frequency dependence of  $\chi'_M$  susceptibilities for **1** (a), **2** (b) and **3** (c) under the external dc fields.

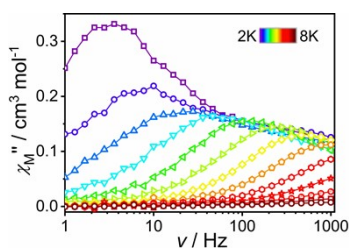

**Fig. S10** Frequency dependence of  $\chi''_M$  susceptibilities for **1** under the external dc fields.

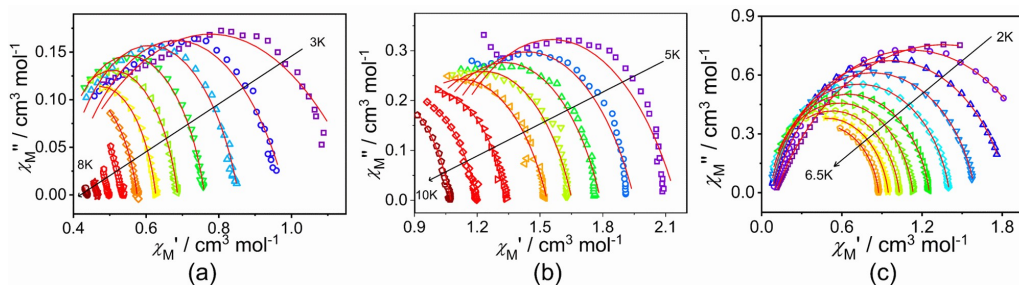

**Fig. S11** Cole-Cole plots under the static dc fields for **1** (a), **2** (b) and **3** (c). The solid lines represent the best fit to the measured results.

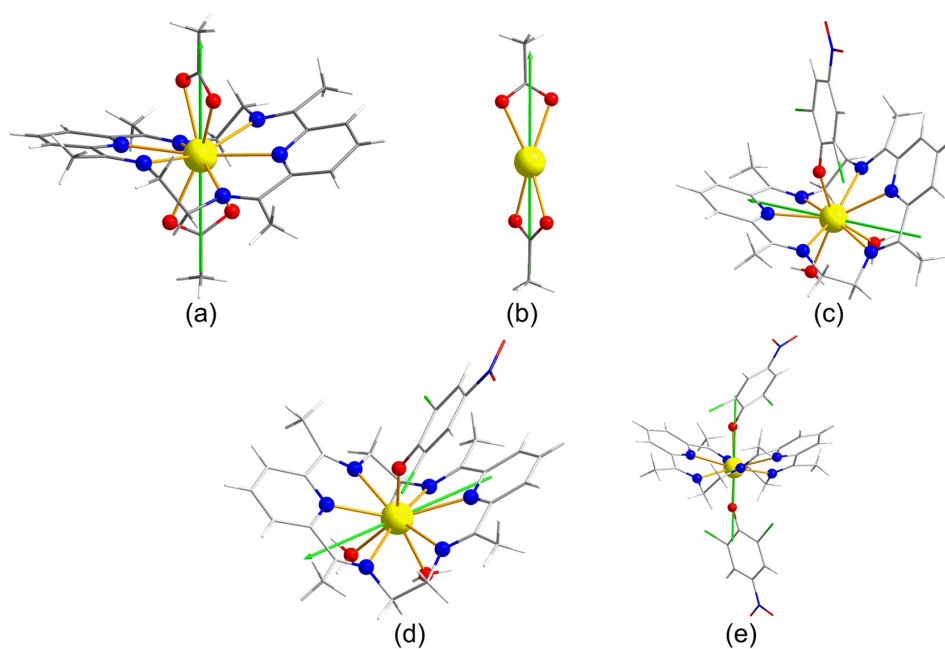

**Fig. S12** Calculated orientations of the local main magnetic axes on Dy(III) in the ground KDs of **1** (a), **1a** (b), **2a** (c), **2b** (d) and **3** (e).

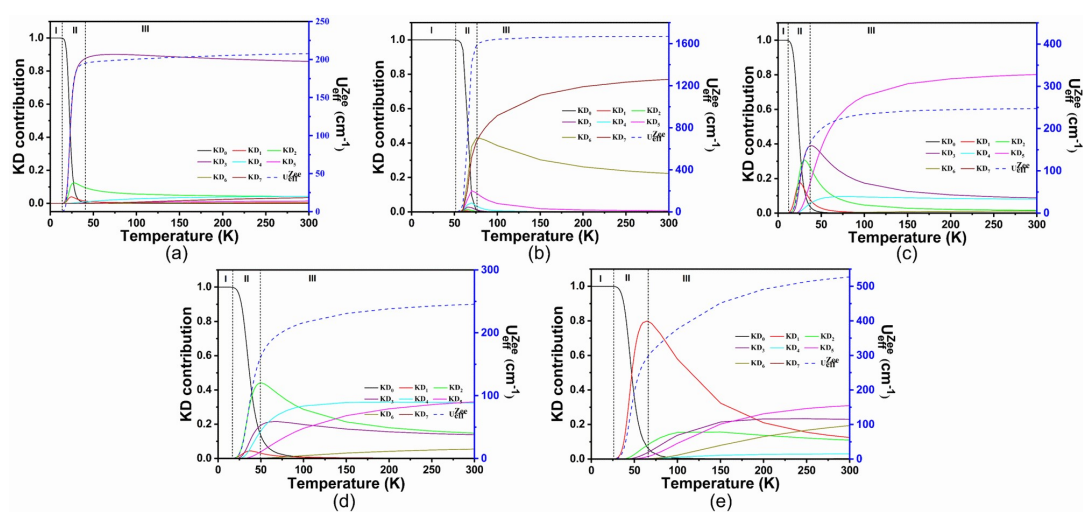

**Fig. S13** Predicted effective barrier and relaxation contributions from various KDs of complexes **1** (a), **1a** (b), **2a** (c), **2b** (d) and **3** (e),  $U_{\text{eff}}$  is represented as a dashed black line, and its value is indicated on the right  $y$ -axis, the left  $y$ -axis represents the relative contribution of each KD to relaxation.
